# Supplementary material
Source: MDPI journal article supplement (https://www.mdpi.com/2073-4441/13/4/427)
Supplement: s1 [file s1]

### Pollen percentage spectra

|  |  |           |
|--|--|-----------|
|  |  | <i>Ph</i> |
|  |  |           |

Pagina 1 di pagine 2

| SAMPLES (N°)             |                                        |       | 1    | 2    | 3    | 4    | 5    | 6    | 7   | 8   | 9   | 10   | 11   | 12   | 13   | 14   | 15   | 16   | 17   | 18   | 19  | 20   | 21   | 22   | 23   | 24   | 25   | 26   | 27   | 28   |      |      |
|--------------------------|----------------------------------------|-------|------|------|------|------|------|------|-----|-----|-----|------|------|------|------|------|------|------|------|------|-----|------|------|------|------|------|------|------|------|------|------|------|
| HALORAGACEAE             | <i>Trifolium</i> type                  | pm    |      |      |      |      |      |      |     |     |     |      |      |      |      |      |      |      |      |      |     |      |      |      |      |      |      |      |      |      | 0,2  |      |
|                          | Fabaceae undiff.                       | pm    |      | 2,1  | 0,7  |      |      |      |     |     |     |      |      | 1,0  | 0,3  | 1,4  | 2,9  | 3,7  |      | 0,5  |     |      |      |      | 0,3  | 0,4  |      |      |      | 1,0  |      |      |
|                          | <i>Myriophyllum incautum</i> type      | hydro |      | 0,5  |      | 1,6  |      |      | 0,4 |     |     |      |      |      |      |      |      |      |      |      |     |      | 0,3  |      |      |      |      |      |      |      |      |      |
|                          | <i>Myriophyllum verticillatum</i> type | As    |      |      |      |      |      |      |     |     |     |      |      |      |      | 1,4  |      | 0,7  |      |      |     |      | 0,3  |      |      |      |      |      |      |      |      |      |
| LAMIACEAE                | <i>Lamium amplexicaule</i> type        | As    |      |      |      |      |      |      |     |     |     |      |      |      |      |      |      |      |      |      |     |      |      | 1,0  |      |      |      |      |      |      |      |      |
|                          | <i>Mentha</i> type                     | As    |      |      |      |      |      |      |     |     |     |      |      |      |      | 0,2  |      |      | 0,4  |      |     |      | 0,3  |      |      |      |      |      |      |      |      |      |
|                          | Lamiaceae undiff.                      |       |      | 0,5  | 0,7  |      |      |      |     |     |     |      |      |      | 1,7  | 1,0  |      | 0,4  |      |      |     | 0,5  | 0,3  |      |      | 2,6  |      | 5,0  |      | 0,2  |      |      |
| LILIACEAE                | Liliaceae undiff.                      |       |      | 0,5  |      |      |      |      |     |     |     |      |      | 0,3  |      |      |      |      |      |      |     |      |      |      |      |      |      |      |      |      |      |      |
| NYMPHAEACEAE             | <i>Nymphaea cf. alba</i>               | hydro |      |      |      |      |      |      |     |     |     |      | 0,5  |      |      |      |      |      |      |      |     |      |      |      |      |      |      |      |      |      |      |      |
| PAPAVERACEAE             | Papaveraceae undiff.                   |       |      |      |      |      |      |      | 0,4 |     |     |      |      |      |      |      |      | 0,2  |      |      |     | 0,3  |      |      |      |      |      |      |      |      |      |      |
| PLANTAGINACEAE           | <i>Dactula purpurea</i> cf.            |       |      |      |      |      |      |      |     |     |     |      |      |      |      |      |      |      |      |      |     |      |      |      |      |      |      |      |      |      |      |      |
|                          | <i>Linaria</i> type                    | As    |      |      |      |      |      |      |     |     |     |      |      |      |      |      |      |      |      |      |     |      |      |      | 0,3  |      |      |      |      |      |      |      |
|                          | <i>Litharella cf. uniflora</i>         | hydro |      |      |      |      |      |      |     |     |     |      |      |      |      |      |      |      |      |      |     |      |      |      |      |      |      |      |      |      |      |      |
|                          | <i>Plantago cf. lanceolata</i>         | As    |      |      | 0,5  |      |      |      | 2,0 | 0,4 |     |      |      |      |      |      |      | 0,2  |      |      |     |      |      |      |      |      |      |      |      |      |      |      |
|                          | <i>Plantago cf. major</i>              | As    |      |      |      | 0,7  |      |      |     |     |     |      |      |      |      |      |      |      |      |      |     |      |      |      |      | 0,3  |      |      |      |      |      |      |
| POACEAE                  | Plantago undiff.                       | As    |      |      |      | 1,4  |      |      |     |     |     |      |      |      |      |      |      |      |      |      |     |      |      |      |      |      |      |      |      |      |      |      |
|                          | <i>Phragmites cf. australis</i>        | helo  |      |      |      | 0,7  |      |      |     |     |     |      |      |      |      | 0,3  |      |      |      |      |     |      |      |      | 0,8  |      |      | 0,6  |      |      |      |      |
|                          | Poaceae spontaneous group              | pm    |      | 11,6 | 10,5 | 4,7  | 2,9  | 9,6  | 1,4 |     |     | 3,4  | 5,1  | 7,7  | 12,9 | 2,9  | 6,8  | 6,8  | 5,1  |      |     | 18,7 | 0,8  | 0,5  | 9,5  | 6,9  |      | 2,5  | 6,6  | 7,2  | 5,6  |      |
| POLYGONACEAE             | <i>Polygonum persicaria</i> group      | As    |      |      |      | 1,6  |      |      |     |     |     |      |      |      | 0,3  |      |      |      |      |      |     |      |      |      |      |      |      |      |      |      |      |      |
|                          | <i>Rumex acetosa</i> type              | As    |      |      | 0,7  |      |      |      |     |     |     |      |      |      |      |      | 0,6  |      |      |      |     | 0,3  |      |      | 1,0  |      |      |      |      |      |      |      |
| POTAMOGETONACEAE         | <i>Potamogeton</i> type                | hydro |      |      |      |      |      |      |     |     |     |      |      |      |      |      |      |      |      |      |     | 0,3  |      |      |      |      |      |      |      |      |      |      |
| PRIMULACEAE              | <i>Primula veris</i> type              |       |      |      |      |      |      |      |     |     |     |      | 0,3  |      |      |      |      |      |      |      |     |      |      |      |      |      |      |      |      |      |      |      |
| RANUNCULACEAE            | <i>Galium palustre</i> type            | hygro |      |      |      |      |      |      |     |     |     |      |      |      |      |      |      | 0,2  |      |      |     |      |      |      |      |      |      |      |      |      |      |      |
|                          | <i>Ranunculus floricola</i> group      |       |      |      |      |      |      |      |     |     |     |      |      |      |      |      |      | 0,3  |      |      |     |      |      |      |      |      |      |      |      |      |      |      |
|                          | <i>Ranunculus flammula</i> group       | hygro |      |      | 0,7  |      | 1,9  |      |     |     |     |      |      |      | 1,8  |      |      |      | 1,1  |      |     |      |      |      |      |      |      |      |      |      |      |      |
|                          | Ranunculaceae undiff.                  |       | 2,1  | 3,5  | 4,7  | 4,8  | 3,2  | 0,7  |     | *   | 2,5 | 3,1  | 1,2  | 3,1  | 1,0  | 2,0  | 1,9  | 5,1  |      |      | 0,8 | 2,5  | 2,1  |      | 1,3  |      |      | 0,2  | 0,5  |      |      |      |
| ROSACEAE                 | <i>Drepanoctenella</i> cf.             | Mt    |      |      |      |      |      |      |     |     |     |      |      |      |      | 0,9  |      |      |      |      |     |      |      |      |      |      |      |      |      |      |      |      |
|                          | Rosaceae undiff.                       |       |      |      | 0,7  |      |      |      |     |     |     |      |      |      |      |      |      |      |      |      |     |      |      |      |      |      |      |      |      |      |      |      |
| RUBIACEAE                | <i>Galium</i> type                     |       |      |      |      |      |      |      |     |     |     |      |      |      |      |      |      | 0,2  |      |      |     |      |      |      |      |      |      |      |      |      |      |      |
| SCROPHULARIACEAE         | <i>Scrophularia</i> type               |       |      | 0,5  |      |      |      |      |     |     |     |      |      |      |      |      |      |      |      |      |     |      |      |      |      |      |      |      |      | 1,1  |      |      |
| SOLANACEAE               | Scrophulariaceae undiff.               |       | 0,5  | 2,1  |      |      |      |      |     |     |     |      | 1,5  |      | 0,6  |      | 0,6  |      |      |      |     |      | 0,8  | 0,5  | 1,6  |      |      | 0,3  |      | 0,2  |      |      |
|                          | Solanaceae undiff.                     |       |      |      |      |      |      |      |     |     |     |      |      |      |      |      |      |      |      |      |     |      |      |      |      |      |      |      | 0,9  |      |      |      |
| TYPHACEAE                | <i>Suaeda maritima</i> type            | hydro |      |      |      |      |      |      |     |     |     |      |      |      |      |      |      |      |      |      |     |      |      |      | 1,0  |      |      | 0,6  | 0,2  | 0,2  |      |      |
|                          | <i>Typha angustifolia</i> L.           | helo  |      |      |      |      |      |      |     |     |     |      |      |      |      |      |      |      |      |      |     |      |      | 0,5  |      |      |      |      |      |      |      |      |
|                          | <i>Typha latifolia</i> type            | helo  |      | 1,1  |      |      |      |      |     |     |     |      | 0,3  | 0,5  |      |      |      |      |      |      |     |      |      |      |      |      |      |      |      |      | 0,5  |      |
| URTICACEAE               | <i>Parietaria</i>                      | As    |      |      |      |      | 1,9  |      |     |     |     |      | 0,3  |      |      |      | 1,9  | 0,9  |      | 0,5  |     | 0,3  |      |      |      |      |      |      |      |      |      |      |
|                          | Urticaceae undiff.                     | As    |      | 3,2  |      |      | 1,6  |      |     |     |     |      | 3,6  | 0,6  |      |      |      | 0,2  | 1,1  | 1,0  |     | 0,5  |      |      |      |      |      |      |      |      |      |      |
| UNDETERMINATED GRAINS    |                                        |       | 1,1  | 2,1  | 10,9 | 1,0  | 1,2  | 1,1  |     | *   | *   | 0,6  | 1,0  |      | 2,9  |      |      | 0,8  | 0,5  |      |     | 1,0  | 0,6  | 0,5  |      | 4,3  |      |      | 7,5  | 0,3  | 0,7  |      |
| UNDETERMINABLE GRAINS    |                                        |       | 5,8  | 4,2  | 7,8  | 28,6 | 26,7 | 24,1 | *   | *   |     | 13,8 | 3,6  | 3,6  | 13,5 | 6,0  | 27,6 | 7,4  | 18,2 | 10,2 | *   | 11,7 | 12,7 | 12,8 | 1,0  |      |      | 17,5 |      | 7,9  | 4,9  |      |
| MONILOPHYTA              |                                        |       |      |      |      |      |      |      |     |     |     |      |      |      |      |      |      |      |      |      |     |      |      |      |      |      |      |      |      |      |      |      |
| ASPLENIACEAE             | <i>Asplenium</i> tipo                  |       |      |      |      |      |      |      |     |     |     |      |      |      |      |      |      |      |      |      |     |      |      |      |      |      |      |      |      |      |      |      |
| POLYPODIACEAE            | <i>Polypodium vulgare</i> tipo         |       |      |      |      |      |      |      |     |     |     |      |      |      |      |      |      |      |      |      |     |      |      |      |      |      |      |      |      |      |      |      |
| PTERIDACEAE              | <i>Pteris</i> cf.                      |       |      |      |      |      |      |      |     |     |     |      |      |      |      |      |      |      |      |      |     |      |      |      |      |      |      |      |      |      |      |      |
| FILICALES MONOLETI       |                                        |       | 3,1  | 14,7 | 5,7  | 5,3  | 3,9  | 1,4  |     |     |     | 3,2  | 2,4  | 8,1  | 6,4  | 15,0 | 18,4 | 12,2 | 28,1 | *    | 5,4 | 4,2  | 9,2  |      | 13,1 |      |      | 12,8 |      | 16,2 |      |      |
| FILICALES TRILETI        |                                        |       |      | 4,5  | 2,9  | 2,6  | 6,1  | 1,4  |     |     |     | 1,2  | 3,4  | 9,4  | 13,7 | 13,6 | 7,3  | 2,9  | 2,8  | *    | 0,7 | 0,3  | 0,5  | 2,0  |      |      |      | 2,1  |      |      |      |      |
| MONILOPHYTA - TOTAL      |                                        |       | 3,1  | 19,2 | 8,6  | 7,9  | 10,0 | 2,8  |     |     |     | 4,4  | 5,8  | 17,5 | 20,1 | 28,6 | 25,6 | 15,1 | 30,9 |      | 6,1 | 4,5  | 9,7  |      | 13,1 |      | 14,9 |      |      | 16,2 |      |      |
| ALLIA                    |                                        |       |      |      |      |      |      |      |     |     |     |      |      |      |      |      |      |      |      |      |     |      |      |      |      |      |      |      |      |      |      |      |
| HYSTRICOSPHERIDIA        |                                        |       |      |      |      |      |      |      |     |     |     |      |      |      |      |      |      |      |      |      |     |      |      |      |      |      |      |      |      |      |      |      |
| SECONDARY GRAINS         |                                        |       |      |      |      |      |      |      |     |     |     |      |      |      |      |      |      |      |      |      |     |      |      |      |      |      |      |      |      |      |      |      |
| SECONDARY GRAINS - TOTAL | <i>Alnus</i>                           |       |      |      |      |      |      |      |     |     |     |      |      |      |      |      |      |      |      |      |     |      |      |      |      |      |      |      |      |      |      |      |
|                          | Ericaceae                              |       |      |      |      |      |      |      |     |     |     |      |      |      |      |      |      |      | 0,4  |      |     |      |      |      |      |      |      |      |      |      |      |      |
|                          | <i>Quercus ilex</i> L.                 |       |      |      |      |      |      |      |     |     |     |      | 0,3  |      |      |      |      |      |      |      |     |      |      |      | 0,3  |      |      |      |      |      |      |      |
|                          | <i>Quercus caducif. indiff.</i>        |       |      |      |      |      |      |      |     |     |     |      |      |      |      |      |      |      |      |      |     |      |      |      |      |      |      |      |      |      |      |      |
|                          | Pinaceae                               |       |      |      |      |      |      |      |     |     |     |      |      |      |      |      |      |      | 0,4  |      |     |      |      |      |      |      |      |      |      |      |      |      |
|                          | Poaceae                                |       |      |      |      |      |      |      |     |     |     |      |      |      |      |      |      |      |      |      |     |      |      |      |      |      |      |      |      |      |      |      |
|                          | Ranunculaceae                          |       |      |      |      |      |      |      |     |     |     |      |      | 0,5  | 0,3  |      |      | 0,4  |      |      |     |      |      |      |      |      |      |      |      |      |      |      |
|                          | Undeterminable grains                  |       |      |      |      |      |      |      |     |     |     |      |      |      |      |      |      |      |      |      |     |      |      |      |      |      |      |      |      |      |      |      |
| GROUPS                   |                                        |       |      |      |      |      |      |      |     |     |     |      | 0,6  | 0,5  | 0,6  |      |      |      | 1,1  |      |     |      |      |      |      |      |      |      |      |      |      |      |
| WOODY TAXA               | T+s+h+L                                |       | 51,9 | 68,5 | 71,9 | 83,8 | 75,7 | 91,8 |     |     |     |      | 86,2 | 81,0 | 80,1 | 63,7 | 81,9 | 76,1 | 83,7 | 81,7 |     |      | 61,1 | 92,8 | 92,1 | 78,4 | 75,0 | 86,1 | 82,5 | 77,7 | 80,1 | 86,8 |
| TREES                    | T+s+h+L                                |       | 45,5 | 56,6 | 65,6 | 76,2 | 67,7 | 84,0 |     |     |     |      | 66,8 | 69,7 | 66,9 | 56,3 | 62,9 | 64,1 | 68,9 | 65,5 |     |      | 58,8 | 90,1 | 90,3 | 61,3 | 6    |      |      |      |      |      |
